# Supplementary material for: Mechanism and Efficacy of Cu2O-Treated Fabric
Source: MDPI journal article supplement (doi:10.3390/antibiotics11111633), 2022-11-16
Supplement: s1 [file s1]

## Mechanism and Efficacy of Cu<sub>2</sub>O-Treated Fabric

Zachary Benmamoun, Trent Wyhopen, You Li, and William A. Ducker\*

\*Corresponding Authors' Email: wducker@vt.edu

Dept. of Chemical Engineering and Center for Soft Matter and Biological Physics, Virginia Tech,  
Blacksburg, Virginia, 24061, USA

### S1. Particle Size and Chemical purity

| Lot U1957 (5 µm) |     | Lot 123942 (2 µm) |     |
|------------------|-----|-------------------|-----|
| Mean size (µm)   | 5.5 | Mean size (µm)    | 2.0 |
| Median size (µm) | 5.0 | Median size (µm)  | 1.6 |
| Mode size (µm)   | 5.5 | Mode size (µm)    | 1.2 |
| St dev (µm)      | 3.1 | St dev (µm)       | 1.4 |

**Table S1.** Cuprous oxide particle size distribution

Note that the particles that we label as 1 µm had a mean size of 2.0 µm and are labelled as 2 µm in the paper.

| Lot U1957 (5 µm) |      | Lot 123942 (2 µm) |      |
|------------------|------|-------------------|------|
| Cuprous oxide %  | 96.2 | Cuprous oxide %   | 94.6 |
| Cupric oxide %   | 2.1  | Cupric oxide %    | 3.6  |
| Metallic Cu      | 0.7  | Metallic Cu       | 1.0  |
| Lead ppm         | 61   | Lead ppm          | 125  |
| Cadmium ppm      | 0    | Cadmium ppm       | 0    |
| Arsenic ppm      | 0    | Arsenic ppm       | 3    |

**Table S2.** Cuprous oxide purity

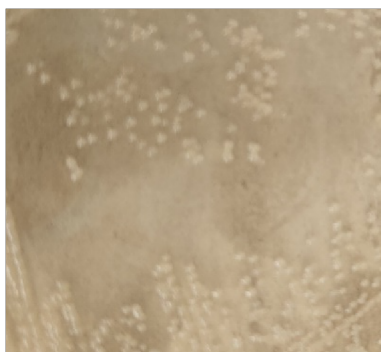

MRSA colonies on TSA

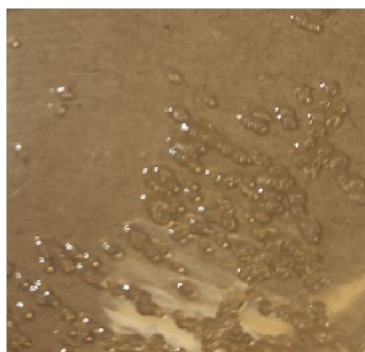

*P. aeruginosa* colonies on TSA

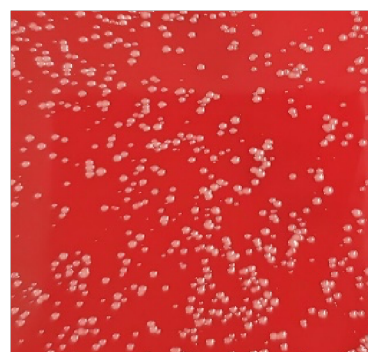

*S. pneumoniae* colonies on TSAB

**Figure S1.** Photographs showing typical bacterial colonies of each organism.

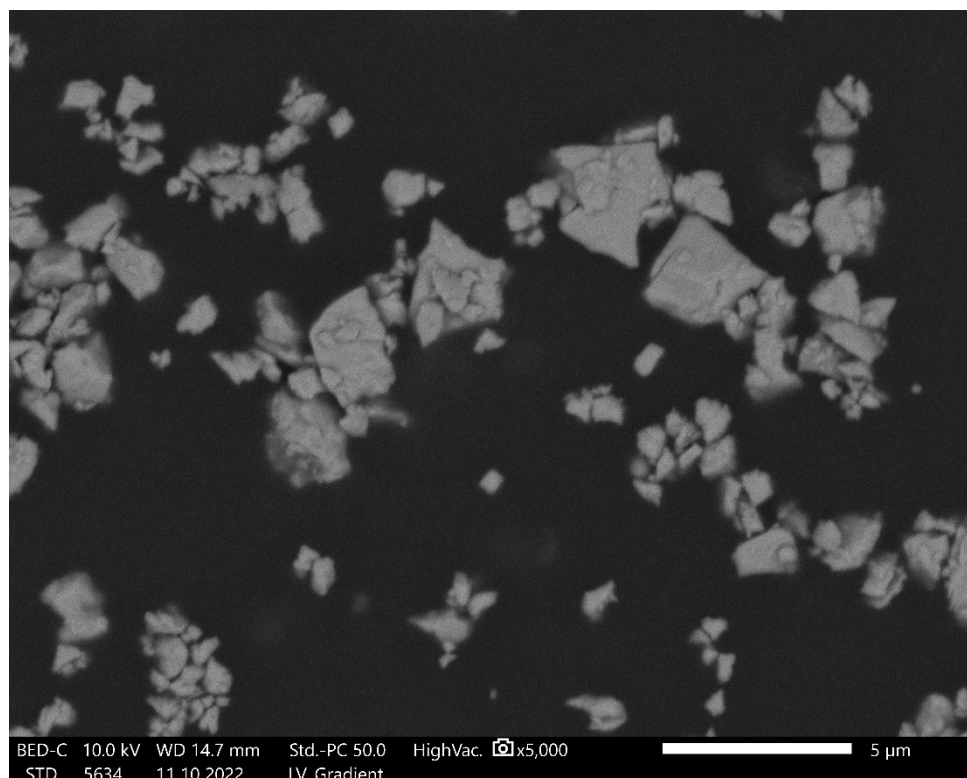

**Figure S2.** SEM image of 2  $\mu\text{m}$   $\text{Cu}_2\text{O}$  particles

## S2. Data Tables

| Treatment        | Time (min) | % $\text{Cu}_2\text{O}$ lost by washing |
|------------------|------------|-----------------------------------------|
| Unheated samples | 5          | 58.2                                    |
|                  | 10         | 62.9                                    |
|                  | 15         | 61.6                                    |
|                  | 30         | 77.8                                    |
|                  | 45         | 85.3                                    |
| Heated samples   | 5          | 40.2                                    |
|                  | 10         | 32.3                                    |
|                  | 15         | 51.1                                    |
|                  | 30         | 29.6                                    |
|                  | 45         | 29.8                                    |

**Table S3.** Weight % loss of  $\text{Cu}_2\text{O}$  by washing of  $\text{Cu}_2\text{O}$ -impregnated PP textiles. Heat treated and not heat treated are compared.

| Material                                    | Time | Average % loss |
|---------------------------------------------|------|----------------|
| 2 $\mu\text{m}$ $\text{Cu}_2\text{O}$ on PP | 0    | 0              |
|                                             | 15   | 0.05           |
|                                             | 30   | -0.7           |
|                                             | 45   | -0.9           |
|                                             | 60   | 0.09           |
|                                             | 75   | -0.6           |
|                                             | 90   | -0.4           |
|                                             | 105  | -0.2           |
|                                             | 1440 | 5.2            |

|                                             |      |      |
|---------------------------------------------|------|------|
| 5 $\mu\text{m}$ $\text{Cu}_2\text{O}$ on PP | 0    | 0    |
|                                             | 15   | 2.4  |
|                                             | 30   | 4.0  |
|                                             | 45   | 8.3  |
|                                             | 60   | 10.6 |
|                                             | 75   | 13.3 |
|                                             | 90   | 11.7 |
|                                             | 105  | 13.4 |
|                                             | 1440 | 16.1 |

**Table S4.** Weight % loss of  $\text{Cu}_2\text{O}$  by airflow durability testing against  $\text{Cu}_2\text{O}$ -impregnated PP textiles.

| Material                                    | Time (min) | Average % loss |
|---------------------------------------------|------------|----------------|
| 2 $\mu\text{m}$ $\text{Cu}_2\text{O}$ on PP | 0          | 0              |
|                                             | 1440       | 5.5            |
| 5 $\mu\text{m}$ $\text{Cu}_2\text{O}$ on PP | 0          | 0              |
|                                             | 1440       | 8.3            |

**Table S5.** Weight % loss of added  $\text{Cu}_2\text{O}$  by airflow durability testing against  $\text{Cu}_2\text{O}$ -impregnated PP textiles in humidity chamber.

| Material                     | Time (min) | CFU             | Log CFU |
|------------------------------|------------|-----------------|---------|
| Nil (input bacteria control) | 0          | $4 \times 10^6$ | 6.7     |
|                              |            | $5 \times 10^6$ |         |
|                              |            | $6 \times 10^6$ |         |
| Polypropylene (PP)           | 0          | $4 \times 10^6$ | 6.6     |
|                              |            | $6 \times 10^6$ |         |
|                              |            | $4 \times 10^6$ |         |
|                              | 5          | $3 \times 10^6$ | 6.5     |
|                              |            | $3 \times 10^6$ |         |
|                              |            | $3 \times 10^6$ |         |
|                              | 10         | $3 \times 10^6$ | 6.4     |
|                              |            | $2 \times 10^6$ |         |
|                              |            | $3 \times 10^6$ |         |
|                              | 30         | $1 \times 10^6$ | 6.4     |
|                              |            | $4 \times 10^6$ |         |
|                              |            | $2 \times 10^6$ |         |
|                              | 60         | $1 \times 10^6$ | 5.7     |
|                              |            | $3 \times 10^5$ |         |
|                              |            | $4 \times 10^5$ |         |

|                                             |    |                 |     |
|---------------------------------------------|----|-----------------|-----|
| 1 $\mu\text{m}$ $\text{Cu}_2\text{O}$ on PP | 0  | $2 \times 10^6$ | 6.3 |
|                                             |    | $2 \times 10^6$ |     |
|                                             |    | $2 \times 10^6$ |     |
|                                             | 5  | $4 \times 10^4$ | 5.4 |
|                                             |    | $5 \times 10^5$ |     |
|                                             |    | $2 \times 10^5$ |     |
|                                             | 10 | $6 \times 10^4$ | 4.8 |
|                                             |    | $7 \times 10^4$ |     |
|                                             |    | $4 \times 10^4$ |     |
|                                             | 30 | $1 \times 10^2$ | 3.3 |
|                                             |    | $5 \times 10^3$ |     |
|                                             |    | 50              |     |
|                                             | 60 | 50              | 2   |
|                                             |    | 50              |     |
|                                             |    | $2 \times 10^2$ |     |
| 5 $\mu\text{m}$ $\text{Cu}_2\text{O}$ on PP | 0  | $1 \times 10^6$ | 5.9 |
|                                             |    | $7 \times 10^5$ |     |
|                                             |    | $9 \times 10^5$ |     |
|                                             | 5  | $3 \times 10^5$ | 5.6 |
|                                             |    | $6 \times 10^5$ |     |
|                                             |    | $4 \times 10^5$ |     |
|                                             | 10 | $5 \times 10^5$ | 5.2 |
|                                             |    | $2 \times 10^3$ |     |
|                                             |    | $1 \times 10^4$ |     |
|                                             | 30 | $2 \times 10^3$ | 3.0 |
|                                             |    | 50              |     |
|                                             |    | $1 \times 10^3$ |     |
|                                             | 60 | $2 \times 10^2$ | 1.9 |
|                                             |    | 50              |     |
|                                             |    | 50              |     |

**Table S6.** Bacterial CFU data of MRSA on  $\text{Cu}_2\text{O}$  – impregnated PP and control PP.

| Material                     | Time (min) | CFU             | Log CFU |
|------------------------------|------------|-----------------|---------|
| Nil (input bacteria control) | 0          | $3 \times 10^6$ | 6.5     |
|                              |            | $3 \times 10^6$ |         |
|                              |            | $3 \times 10^6$ |         |
| Polypropylene (PP)           | 0          | $3 \times 10^6$ | 6.4     |
|                              |            | $2 \times 10^6$ |         |
|                              |            | $2 \times 10^6$ |         |
|                              | 30         | $8 \times 10^6$ | 6.7     |
|                              |            | $4 \times 10^6$ |         |
|                              |            | $3 \times 10^6$ |         |
|                              | 60         | $2 \times 10^6$ | 6.3     |
|                              |            | $2 \times 10^6$ |         |

|                                             |    |                   |     |
|---------------------------------------------|----|-------------------|-----|
| 1 $\mu\text{m}$ $\text{Cu}_2\text{O}$ on PP | 0  | 2x10 <sup>6</sup> | 5.2 |
|                                             |    | 2x10 <sup>5</sup> |     |
|                                             |    | 1x10 <sup>5</sup> |     |
|                                             |    | 2x10 <sup>5</sup> |     |
|                                             | 30 | <                 | <   |
| 5 $\mu\text{m}$ $\text{Cu}_2\text{O}$ on PP | 0  | 3x10 <sup>5</sup> | 5.5 |
|                                             |    | 4x10 <sup>5</sup> |     |
|                                             |    | 2x10 <sup>5</sup> |     |
|                                             | 30 | <                 | <   |
|                                             | 60 | <                 | <   |

**Table S7.** Bacterial CFU data of *Pseudomonas* on  $\text{Cu}_2\text{O}$  – impregnated PP and control PP. < means that zero colonies were observed.

| Material                                    | Time (min) | CFU               | Log CFU |
|---------------------------------------------|------------|-------------------|---------|
| Nil (input bacteria control)                | 0          | 4x10 <sup>5</sup> | 6.7     |
|                                             |            | 5x10 <sup>5</sup> |         |
|                                             |            | 5x10 <sup>5</sup> |         |
| Polypropylene (PP)                          | 0          | 9x10 <sup>4</sup> | 4.9     |
|                                             |            |                   |         |
|                                             | 30         | 1x10 <sup>5</sup> | 5.0     |
|                                             |            | 5x10 <sup>4</sup> |         |
|                                             |            | 1x10 <sup>5</sup> |         |
|                                             |            | 8x10 <sup>4</sup> |         |
|                                             | 60         | 3x10 <sup>3</sup> | 3.4     |
|                                             |            | 3x10 <sup>3</sup> |         |
|                                             |            | 2x10 <sup>3</sup> |         |
| 1 $\mu\text{m}$ $\text{Cu}_2\text{O}$ on PP | 0          | 2x10 <sup>3</sup> | 3.4     |
|                                             |            | 4x10 <sup>4</sup> |         |
|                                             |            | 1x10 <sup>3</sup> |         |
|                                             | 30         | <                 | <       |
|                                             |            | <                 |         |
|                                             |            | <                 |         |
|                                             | 60         | <                 | <       |
|                                             |            | <                 |         |
|                                             |            | <                 |         |
| 5 $\mu\text{m}$ $\text{Cu}_2\text{O}$ on PP | 0          | 2x10 <sup>3</sup> | 3.5     |
|                                             |            | 6x10 <sup>3</sup> |         |
|                                             |            | 3x10 <sup>3</sup> |         |
|                                             | 30         | <                 | <       |
|                                             |            | <                 |         |
|                                             |            | <                 |         |
|                                             | 60         | <                 | <       |
|                                             |            | <                 |         |

|  |  |   |  |
|--|--|---|--|
|  |  | < |  |
|  |  | < |  |

**Table S8.** Bacterial CFU data of Strep on Cu<sub>2</sub>O – impregnated PP and control PP.

| Bacterium                       | Material                               | Time (min) | CFU               | Log CFU |
|---------------------------------|----------------------------------------|------------|-------------------|---------|
| MRSA                            | 1 µm Cu <sub>2</sub> O on PP           | 0          | 4x10 <sup>6</sup> | 6.6     |
|                                 |                                        |            | 4x10 <sup>6</sup> |         |
|                                 |                                        |            | 4x10 <sup>6</sup> |         |
|                                 |                                        | 30         | 9x10 <sup>4</sup> | 4.8     |
|                                 |                                        |            | 3x10 <sup>4</sup> |         |
|                                 |                                        |            | 8x10 <sup>4</sup> |         |
|                                 |                                        | 60         | 2x10 <sup>5</sup> | 5.3     |
|                                 |                                        |            | 2x10 <sup>5</sup> |         |
|                                 |                                        |            | 7x10 <sup>4</sup> |         |
|                                 | 1 µm Cu <sub>2</sub> O on PP with DDTC | 0          | 4x10 <sup>6</sup> | 6.5     |
|                                 |                                        |            | 3x10 <sup>6</sup> |         |
|                                 |                                        |            | 3x10 <sup>6</sup> |         |
|                                 |                                        | 30         | 1x10 <sup>6</sup> | 6.1     |
|                                 |                                        |            | 1x10 <sup>6</sup> |         |
|                                 |                                        |            | 1x10 <sup>6</sup> |         |
|                                 |                                        | 60         | 9x10 <sup>5</sup> | 5.9     |
|                                 |                                        |            | 9x10 <sup>5</sup> |         |
|                                 |                                        |            | 8x10 <sup>5</sup> |         |
| <i>Pseudomonas aeruginosa</i>   | 1 µm Cu <sub>2</sub> O on PP           | 0          | 2x10 <sup>5</sup> | 5.3     |
|                                 |                                        |            | 1x10 <sup>5</sup> |         |
|                                 |                                        |            | 2x10 <sup>5</sup> |         |
|                                 |                                        | 30         | 3x10 <sup>3</sup> | 4.6     |
|                                 |                                        |            | 1x10 <sup>5</sup> |         |
|                                 |                                        |            | 1x10 <sup>4</sup> |         |
|                                 |                                        | 60         | 2x10 <sup>3</sup> | 3.8     |
|                                 |                                        |            | 2x10 <sup>4</sup> |         |
|                                 |                                        |            | 1x10 <sup>3</sup> |         |
|                                 | 1 µm Cu <sub>2</sub> O on PP with DDTC | 0          | 2x10 <sup>3</sup> | 5.3     |
|                                 |                                        |            | 1x10 <sup>3</sup> |         |
|                                 |                                        |            | 2x10 <sup>3</sup> |         |
|                                 |                                        | 30         | 2x10 <sup>5</sup> | 5.3     |
|                                 |                                        |            | 3x10 <sup>5</sup> |         |
|                                 |                                        |            | 2x10 <sup>5</sup> |         |
|                                 |                                        | 60         | 1x10 <sup>5</sup> | 4.9     |
|                                 |                                        |            | 3x10 <sup>4</sup> |         |
|                                 |                                        |            | 8x10 <sup>4</sup> |         |
| <i>Streptococcus pneumoniae</i> | 1 µm Cu <sub>2</sub> O on PP           | 0          | 9'10 <sup>5</sup> | 6.0     |
|                                 |                                        |            | 1x10 <sup>6</sup> |         |

|  |                                        |    |                   |     |
|--|----------------------------------------|----|-------------------|-----|
|  |                                        |    | 9x10 <sup>5</sup> |     |
|  |                                        | 30 | 2x10 <sup>5</sup> | 5.2 |
|  |                                        |    | 2x10 <sup>5</sup> |     |
|  |                                        |    | 3x10 <sup>4</sup> |     |
|  |                                        | 60 | <                 | 1.9 |
|  |                                        |    | <                 |     |
|  |                                        |    | 2x10 <sup>2</sup> |     |
|  | 1 µm Cu <sub>2</sub> O on PP with DDTC | 0  | 1'10 <sup>6</sup> | 6.0 |
|  |                                        |    | 9x10 <sup>5</sup> |     |
|  |                                        |    | 1x10 <sup>6</sup> |     |
|  |                                        | 30 | 9x10 <sup>4</sup> | 4.7 |
|  |                                        |    | 4x10 <sup>4</sup> |     |
|  |                                        |    | 3x10 <sup>4</sup> |     |
|  |                                        | 60 | 1x10 <sup>5</sup> | 4.9 |
|  |                                        |    | 5x10 <sup>4</sup> |     |
|  |                                        |    | 9x10 <sup>4</sup> |     |

**Table S9.** CFU data of bacterial test droplet on surface in humidity chamber with and without chelating agent (DDTC).

| Material                  | Time | CFU               | Log CFU |
|---------------------------|------|-------------------|---------|
| Nil (input bacteria)      | 5    | 3x10 <sup>5</sup> | 5.5     |
|                           |      | 3x10 <sup>5</sup> |         |
|                           |      | 4x10 <sup>5</sup> |         |
|                           | 60   | 3x10 <sup>5</sup> | 5.5     |
|                           |      | 3x10 <sup>5</sup> |         |
|                           |      | 3x10 <sup>5</sup> |         |
| DDTC control              | 5    | 2x10 <sup>5</sup> | 5.3     |
|                           |      | 2x10 <sup>5</sup> |         |
|                           |      | 2x10 <sup>5</sup> |         |
|                           | 60   | 4x10 <sup>5</sup> | 5.6     |
|                           |      | 4x10 <sup>5</sup> |         |
|                           |      | 4x10 <sup>5</sup> |         |
| BCCA control              | 5    | 2x10 <sup>5</sup> | 5.1     |
|                           |      | 1x10 <sup>5</sup> |         |
|                           |      | 2x10 <sup>5</sup> |         |
|                           | 60   | 4x10 <sup>5</sup> | 5.6     |
|                           |      | 4x10 <sup>5</sup> |         |
|                           |      | 4x10 <sup>5</sup> |         |
| Cu <sub>2</sub> O control | 5    | 3x10 <sup>5</sup> | 5.2     |
|                           |      | 3x10 <sup>5</sup> |         |
|                           |      | 4x10 <sup>5</sup> |         |
|                           | 60   | 3x10 <sup>5</sup> | 4.4     |
|                           |      | 3x10 <sup>5</sup> |         |
|                           |      | 3x10 <sup>5</sup> |         |
| ½ DDTC                    | 5    | 5x10 <sup>4</sup> | 4.8     |
|                           |      | 6x10 <sup>4</sup> |         |

|           |    |                    |     |
|-----------|----|--------------------|-----|
|           |    | 7x10 <sup>4</sup>  |     |
|           | 60 | 1x10 <sup>5</sup>  | 5.2 |
|           |    | 2x10 <sup>5</sup>  |     |
|           |    | 2x10 <sup>5</sup>  |     |
| ½ BCCA    | 5  | 8x10 <sup>5</sup>  | 6.0 |
|           |    | 1x10 <sup>6</sup>  |     |
|           |    | 8x10 <sup>5</sup>  |     |
|           | 60 | 9x10 <sup>5</sup>  | 6.0 |
|           |    | 9x10 <sup>5</sup>  |     |
|           |    | 1x10 <sup>6</sup>  |     |
| Full DDTC | 5  | 1x10 <sup>5</sup>  | 5.2 |
|           |    | 1x10 <sup>5</sup>  |     |
|           |    | 2x10 <sup>5</sup>  |     |
|           | 60 | 2x10 <sup>5</sup>  | 5.3 |
|           |    | 2x10 <sup>5</sup>  |     |
|           |    | 2x10 <sup>5</sup>  |     |
| Full BCCA | 5  | 8x10 <sup>5</sup>  | 5.9 |
|           |    | 1x10 <sup>6</sup>  |     |
|           |    | 48x10 <sup>5</sup> |     |
|           | 60 | 1x10 <sup>6</sup>  | 6.1 |
|           |    | 1x10 <sup>6</sup>  |     |
|           |    | 1x10 <sup>6</sup>  |     |

**Table S10.** CFU data of cuprous ions and chelated cuprous ion solution killing.

| Material                  | Time | CFU               | Log CFU |
|---------------------------|------|-------------------|---------|
| Nil (input bacteria)      | 30   | 4x10 <sup>4</sup> | 4.2     |
|                           |      | 6x10 <sup>4</sup> |         |
|                           |      | 7x10 <sup>4</sup> |         |
| DDTC control              | 30   | <                 | <       |
|                           |      | <                 |         |
|                           |      | <                 |         |
| BCCA control              | 30   | 2x10 <sup>4</sup> | 4.3     |
|                           |      | 3x10 <sup>4</sup> |         |
|                           |      | 2x10 <sup>4</sup> |         |
| Cu <sub>2</sub> O control | 30   | 2x10 <sup>3</sup> | 2.9     |
|                           |      | 2x10 <sup>3</sup> |         |
|                           |      | 1x10 <sup>3</sup> |         |
| ½ DDTC                    | 30   | 2x10 <sup>3</sup> | 3.4     |
|                           |      | 2x10 <sup>3</sup> |         |
|                           |      | 8x10 <sup>3</sup> |         |
| ½ BCCA                    | 30   | 3x10 <sup>4</sup> | 4.5     |
|                           |      | 5x10 <sup>4</sup> |         |
|                           |      | 3x10 <sup>4</sup> |         |
| Full DDTC                 | 30   | 1x10 <sup>3</sup> | 2.8     |
|                           |      | <                 |         |
|                           |      | <                 |         |



|           |    |                   |     |
|-----------|----|-------------------|-----|
| Full BCCA | 30 | 5x10 <sup>4</sup> | 4.8 |
|           |    | 4x10 <sup>4</sup> |     |
|           |    | 2x10 <sup>5</sup> |     |

**Table S11.** CFU data of cuprous ions and chelated cuprous ion drying droplet killing.

| Chemistry | Bacterium                       | CFU               | Log CFU |
|-----------|---------------------------------|-------------------|---------|
| No DDTC   | MRSA                            | 3x10 <sup>6</sup> | 6.4     |
|           |                                 | 2x10 <sup>6</sup> |         |
|           |                                 | 2x10 <sup>6</sup> |         |
|           | <i>Pseudomonas aeruginosa</i>   | 3x10 <sup>6</sup> | 6.4     |
|           |                                 | 3x10 <sup>6</sup> |         |
|           |                                 | 3x10 <sup>6</sup> |         |
|           | <i>Streptococcus pneumoniae</i> | 2x10 <sup>5</sup> | 6.0     |
|           |                                 | 2x10 <sup>5</sup> |         |
|           |                                 | 5x10 <sup>3</sup> |         |
| DDTC      | MRSA                            | 3x10 <sup>6</sup> | 6.5     |
|           |                                 | 3x10 <sup>6</sup> |         |
|           |                                 | 4x10 <sup>6</sup> |         |
|           | <i>Pseudomonas aeruginosa</i>   | 2x10 <sup>6</sup> | 6.4     |
|           |                                 | 3x10 <sup>6</sup> |         |
|           |                                 | 2x10 <sup>6</sup> |         |
|           | <i>Streptococcus pneumoniae</i> | 5x10 <sup>4</sup> | 5.3     |
|           |                                 | 3x10 <sup>5</sup> |         |
|           |                                 | 2x10 <sup>5</sup> |         |

**Table S12.** Examination of ongoing kill on the nutrient agar plate. We considered the possibility that leachate from the Cu<sub>2</sub>O kills or affects growth on the nutrient agar. To examine this effect, we immersed Cu<sub>2</sub>O-coated fabric in PBS and then bacterial cells were added in suspension. Then we followed our normal procedure of vortexing and sonication and plating cells on the agar that was done in our CFU measurements. Two conditions were examined, one where the chelating agent, DDTC, was added before the cells were introduced and the other where no DDTC was added. Since we know that DDTC inhibits the action of Cu<sub>2</sub>O, if there were an ongoing kill on the agar, then we would expect there to be more cells on the agar plate when the DDTC was present. Our results show no significant difference (P = 0.36 for effect of DDTC and P = 0.54 for combined effect of Organism and DDTC in 2-way ANOVA), which is consistent with no ongoing kill on the plate. A simple t-test for *S. pneumoniae* also showed no significant difference.

| Factor                                | p-value               |
|---------------------------------------|-----------------------|
| Treatment (Cu <sub>2</sub> O vs none) | 4 x 10 <sup>-23</sup> |
| Time                                  | 7 x 10 <sup>-18</sup> |
| Organism                              | 3 x 10 <sup>-9</sup>  |
| Time x Treatment                      | 6 x 10 <sup>-6</sup>  |
| Time x Organism                       | 1 x 10 <sup>-2</sup>  |
| Organism x Treatment                  | 5 x 10 <sup>-2</sup>  |

**Table S13.** Factors and *p*-values for ANOVA of Cu<sub>2</sub>O-treated polypropylene for the data in Figure 3. Treatment factors are no treatment, 2 μm Cu<sub>2</sub>O, and 5 μm Cu<sub>2</sub>O. Response was log CFU.

| Factors                 | <i>p</i> -value    |
|-------------------------|--------------------|
| Organism                | $2 \times 10^{-7}$ |
| Time                    | $2 \times 10^{-7}$ |
| Time x Chelator         | $3 \times 10^{-7}$ |
| Time x Organism         | $3 \times 10^{-4}$ |
| Chelator (DDTC or none) | $6 \times 10^{-3}$ |
| Organism x Chelator     | $7 \times 10^{-2}$ |

**Table S14.** ANOVA of humidity chamber CFU data. Response was log CFU. The chelator has a significant effect on the time-course of killing.

| Factors                | <i>p</i> -value     |
|------------------------|---------------------|
| Time                   | $3 \times 10^{-12}$ |
| Evaporation            | $1 \times 10^{-9}$  |
| Organism               | $5 \times 10^{-4}$  |
| Time x Evaporation     | $4 \times 10^{-1}$  |
| Organism x Evaporation | $8 \times 10^{-1}$  |
| Time x Organism        | 0.1                 |

**Table S15.** ANOVA of humidity chamber and open container CFU data. Response was log CFU. Evaporation is significant, therefore drying significantly affects bacterial CFUs.

### S3. Supporting Figures

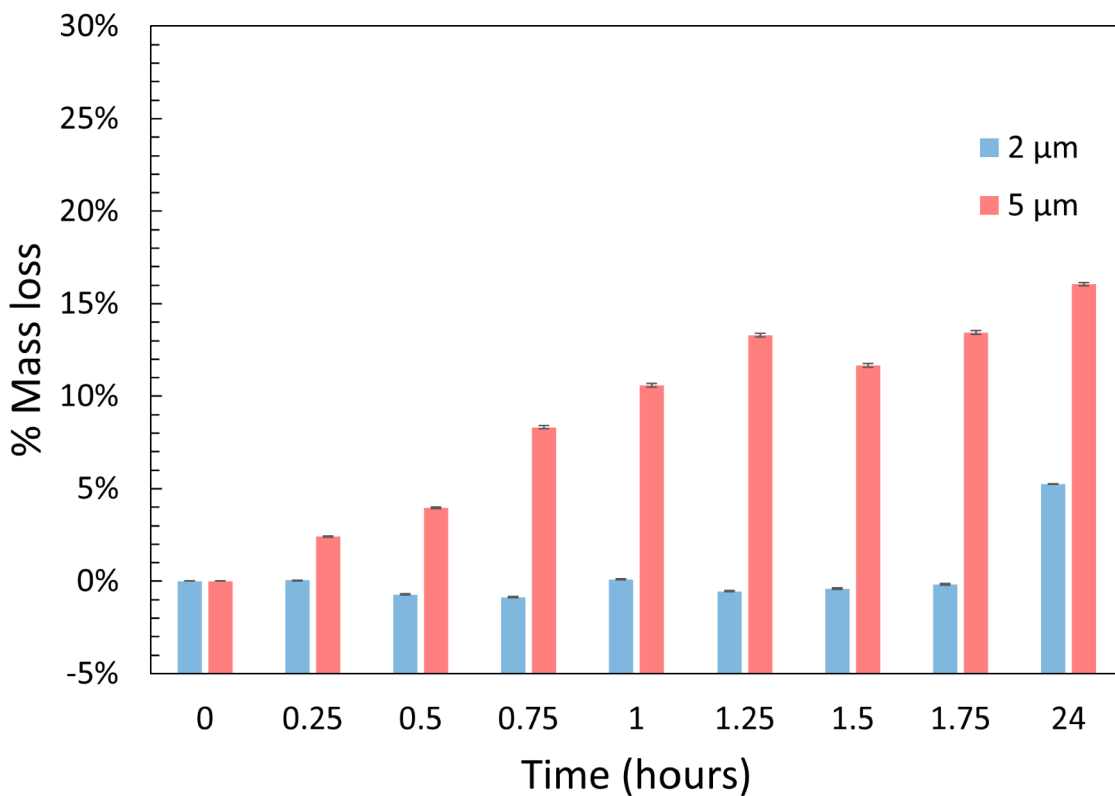

**Figure S3.** Effect of 0.62 m<sup>3</sup>/min airflow for 24 h on loss of Cu<sub>2</sub>O from polypropylene. The vertical axis is the mass of Cu<sub>2</sub>O at the specified time divided by the initial mass of Cu<sub>2</sub>O. The fabric made with 2 μm Cu<sub>2</sub>O particles was more durable to airflow: it lost only 5.2% of the initial Cu<sub>2</sub>O with 100× the normal breathing air flow rate whereas 16% of the 5 μm particles were lost.

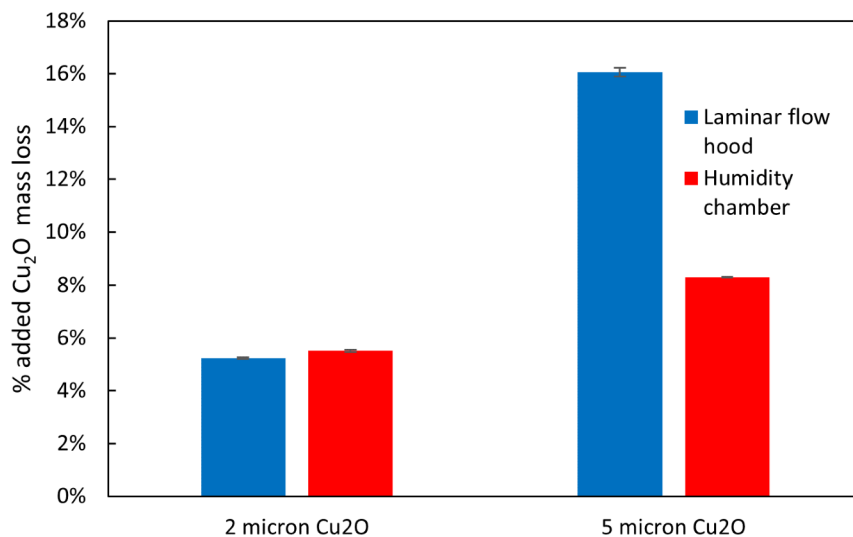

**Figure S4.** Effect of humidity and airflow on mask durability after 24 hours of airflow. There is little effect of humidity.

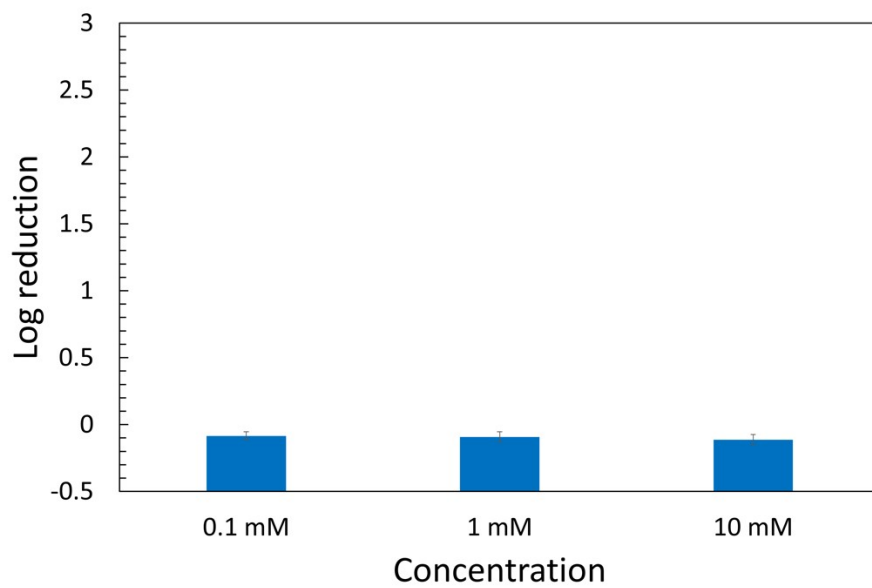

**Figure S5.** CFU reduction by DDTc for cells in suspension. Log Reduction of zero means that the DDTc did not kill any bacteria.

## APPARATUS

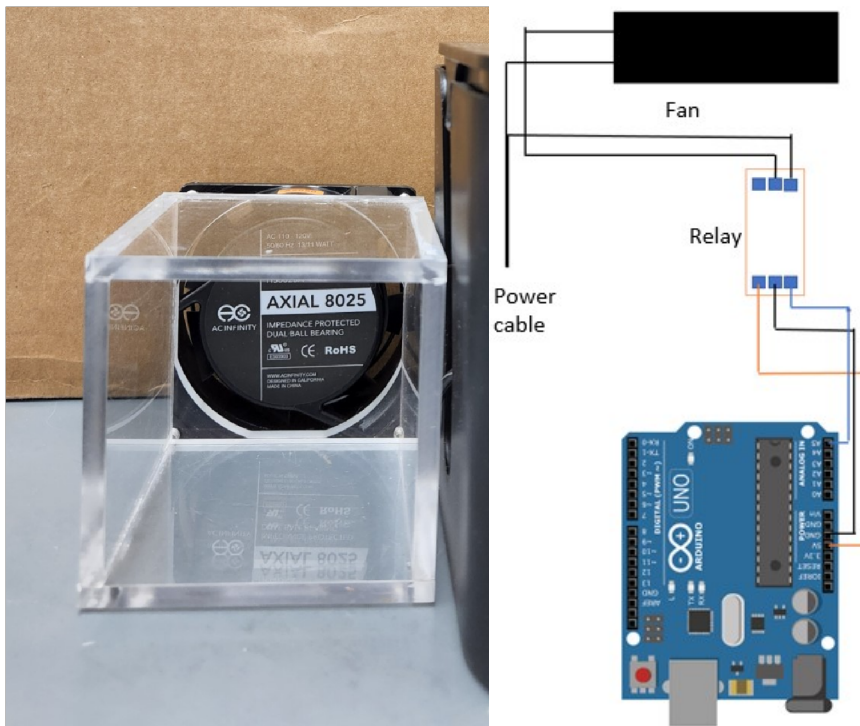

**Figure S6.** Photograph and circuit diagram of apparatus to provide airflow to simulate human breathing on a facemask. Note that the flow alternated between positive flow and off, there was no negative flow.

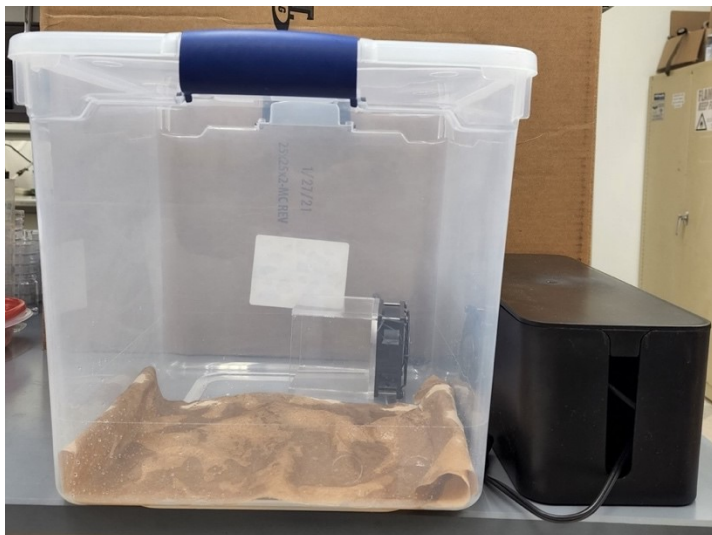

**Figure S7.** Photograph of apparatus for airflow experiments at controlled humidity.

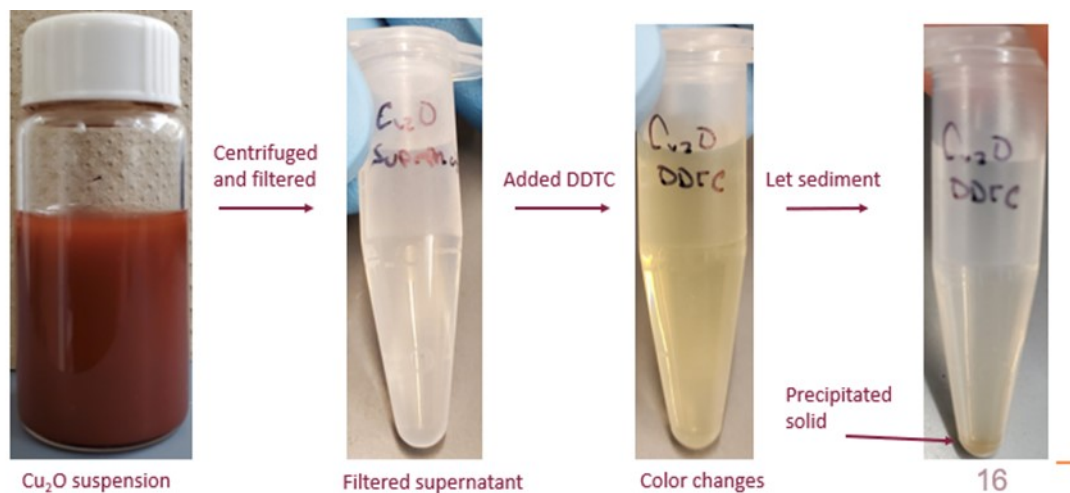

**Figure S8.** Photographs of chelation of copper species by DDTC. There are no cells for these photographs.

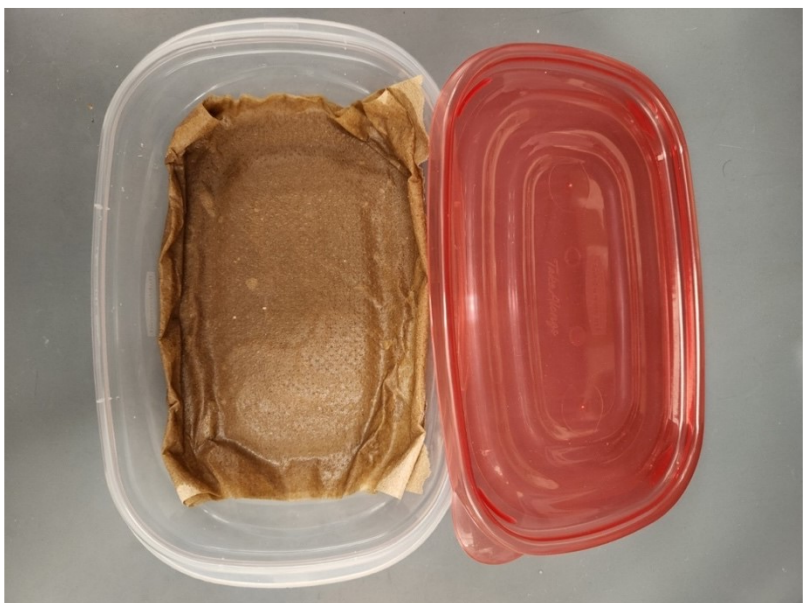

**Figure S9.** Photograph of apparatus for controlling humidity during CFU measurements.
